# Supplementary material for: Detection and Differentiation of SARS-CoV-2, Influenza, and Respiratory Syncytial Viruses by CRISPR
Source: MDPI journal article supplement (doi:10.3390/diagnostics11050823), 2021-05-01
Supplement: s1 [file s1]

**Supplementary Figure S1.**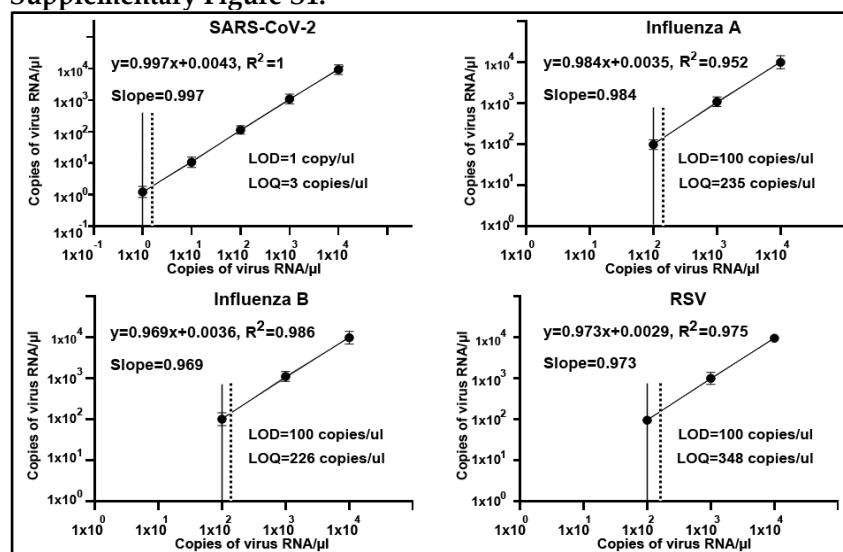

The LOD and LOQ of CRISPR-Cas12a for detecting SARS-CoV-2, influenza A and B, and RSV in serially diluted RNA standard samples. The standard deviation of the response ( $S_y$ ) of the curve and the slope of the calibration curve ( $S$ ) are applied to determine the LOD and LOQ by using the formulas:  $LOD = 3.3(S_y/S)$  and  $LOQ = 10(S_y/S)$ . Solid line indicates LODs, while dotted line shows LOQs of the CRISPR test for detection of each virus, respectively. The Y-axis indicates standard concentrations (copies of virus RNA/ $\mu$ l), X-axis indicate copies of virus RNA/ $\mu$ l measured by the test. Error bars represent the standard deviation from the mean of copies of virus RNA generated from ten replicates in each concentration.

**Supplementary S1.** Accuracy of CRSPR test for detection of SARS-CoV2

| Analyzed dilution samples | Mean      | SD      | CV (%)* |
|---------------------------|-----------|---------|---------|
| 1 copy/ $\mu$ l           | 1.052     | 0.143   | 13.639  |
| 10 copies/ $\mu$ l        | 9.676     | 0.569   | 5.882   |
| 100 copies/ $\mu$ l       | 100.345   | 5.403   | 5.385   |
| 1,000 copies/ $\mu$ l     | 1,003.619 | 15.003  | 3.695   |
| 10,000 copies/ $\mu$ l    | 9,991.666 | 106.745 | 3.287   |

**Supplementary S2.** Accuracy of CRSPR test for detection of Influenza A

| Analyzed dilution samples | Mean       | SD      | CV (%)* |
|---------------------------|------------|---------|---------|
| 100 copies/ $\mu$ l       | 103.261    | 5.568   | 5.392   |
| 1,000 copies/ $\mu$ l     | 1,002.452  | 11.846  | 3.182   |
| 10,000 copies/ $\mu$ l    | 10,025.189 | 151.398 | 4.510   |

**Supplementary S3.** Accuracy of CRSPR test for detection of Influenza B

| Analyzed dilution samples | Mean       | SD      | CV (%)* |
|---------------------------|------------|---------|---------|
| 100 copies/ $\mu$ l       | 102.928    | 8.021   | 7.793   |
| 1,000 copies/ $\mu$ l     | 1,011.276  | 16.442  | 5.640   |
| 10,000 copies/ $\mu$ l    | 10,058.522 | 204.910 | 6.037   |

**Supplementary S4.** Accuracy of CRSPR test for detection of RSV

| Analyzed dilution samples | Mean       | SD      | CV (%)* |
|---------------------------|------------|---------|---------|
| 100 copies/ $\mu$ l       | 103.928    | 11.590  | 11.152  |
| 1,000 copies/ $\mu$ l     | 998.119    | 12.124  | 4.215   |
| 10,000 copies/ $\mu$ l    | 10,072.855 | 196.942 | 5.959   |

\*, CV values are generated from the different concentrations with ten replicates.
